# Supplementary material for: Mini-emulsions based on protic ionic liquids and oleic acid for treatment of dermatophytosis caused by Microsporum canis
Source: Royal Society of Chemistry journal article supplement (doi:10.1039/d3nj01848b), 2023-01-01
Supplement: d3nj01848b1.pdf [file d3nj01848b1.pdf]

## Electronic Supplementary Information

### Nanoemulsions based on protic ionic liquids and oleic acid for treatment of dermatophytosis caused by *Microsporum canis*

Rogério Freitas dos Santos,<sup>a</sup> Bárbara Costa,<sup>b</sup> Leandra Franciscato Campo,<sup>c</sup> Virgínia Serra de Souza,<sup>d</sup> Sandra Cerqueira Pereira,<sup>e</sup> Felipe Lange Coelho,<sup>c</sup> Alexandre Meneghello Fuentefria<sup>b</sup> and Roberta Bussamara<sup>\*a</sup>

<sup>a</sup>Post-Graduate Program in Chemistry (PPGQ), Institute of Chemistry, Laboratory of Proteins and Microorganisms Applied to Chemistry, Universidade Federal do Rio Grande do Sul (UFRGS), Av. Bento Gonçalves, 9500, 91501-970, Porto Alegre, RS, Brazil.

<sup>b</sup>Post-Graduate Program in Pharmaceutical Sciences (PPGCF), Department of Analysis, Laboratory of Applied Mycology, Annex II, Universidade Federal do Rio Grande do Sul (UFRGS), Av. São Luís, 154, 90620-170, Porto Alegre, RS, Brazil.

<sup>c</sup>Research Group on New Organic Materials and Photochemistry, Institute of Chemistry, Universidade Federal do Rio Grande do Sul (UFRGS), Av. Bento Gonçalves 9500, 91501-970, Porto Alegre, RS, Brazil.

<sup>d</sup>Laboratory of Molecular Catalysis, Institute of Chemistry, Universidade Federal do Rio Grande do Sul (UFRGS), Av. Bento Gonçalves 9500, 91501-970, Porto Alegre, RS, Brazil.

<sup>e</sup>Polytechnic Scholl, Engineering Department, Universidade Federal da Bahia (UFBA), s/n°, 40210-630, Salvador, BA, Brazil.

**\*Corresponding Author: [roberta.bussamara@ufrgs.br](mailto:roberta.bussamara@ufrgs.br)**

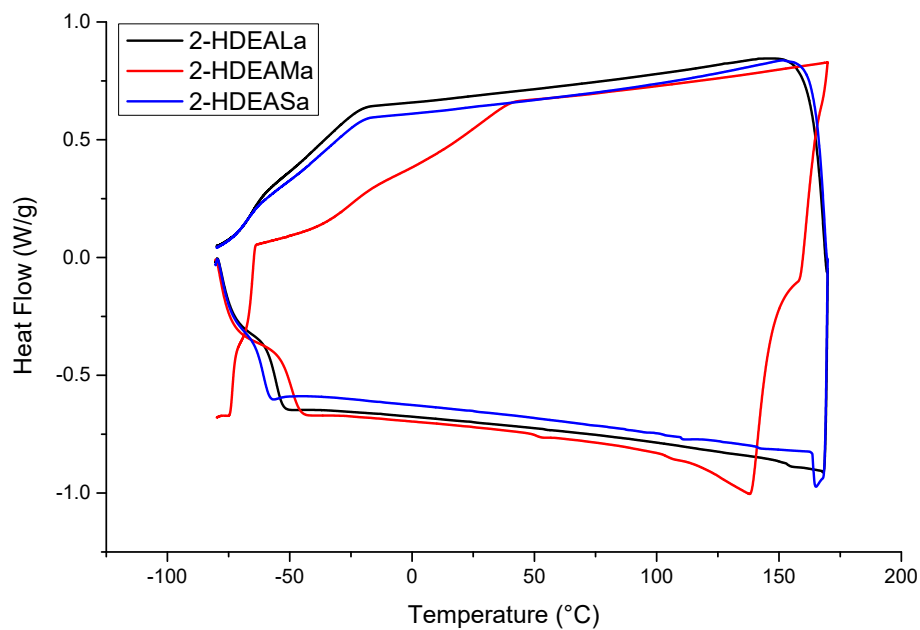

**Figure S1:** DSC thermogram of pure protic ionic liquids 2- HDEALa, 2- HDEAMa, 2- HDEASa.

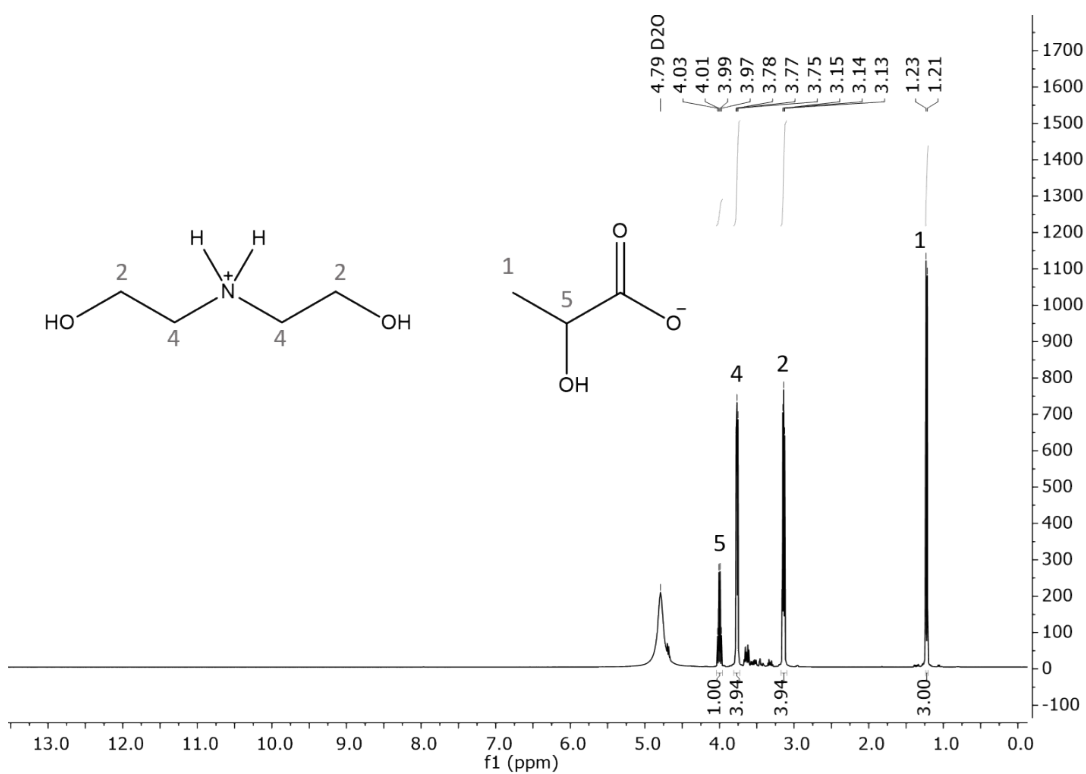

**Figure S2:** <sup>1</sup>H NMR spectrum of pure protic ionic liquid 2- HDEALa.

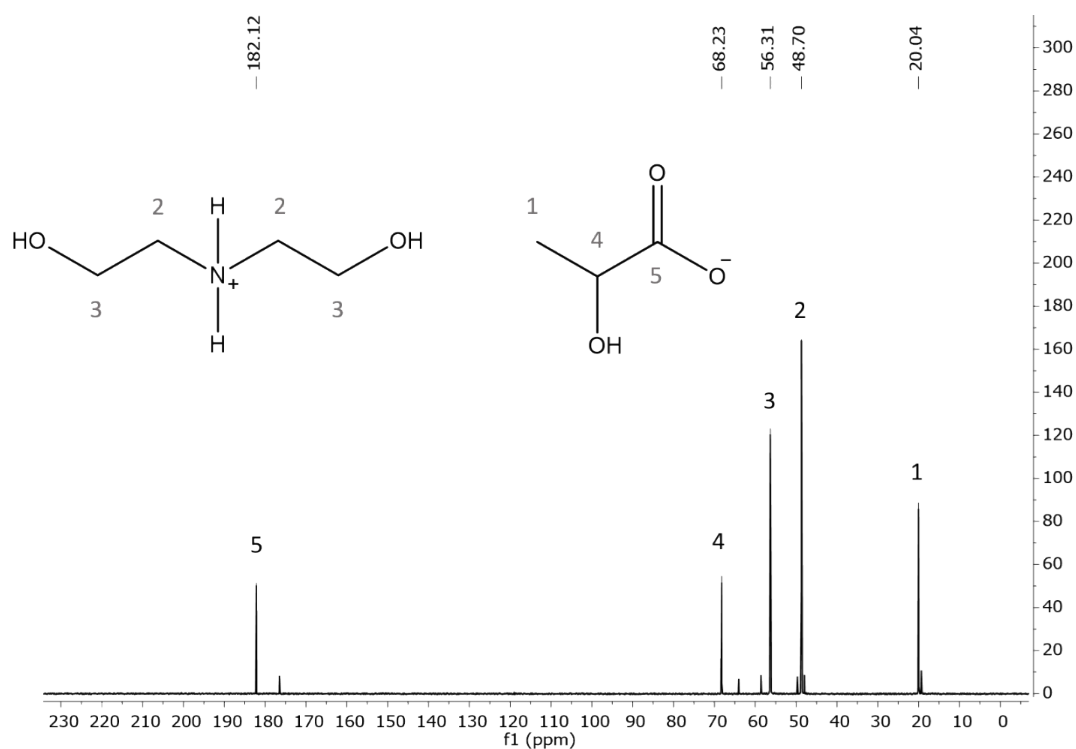

**Figure S3:**  $^{13}\text{C}$  NMR spectrum of pure protic ionic liquid 2- HDEALa.

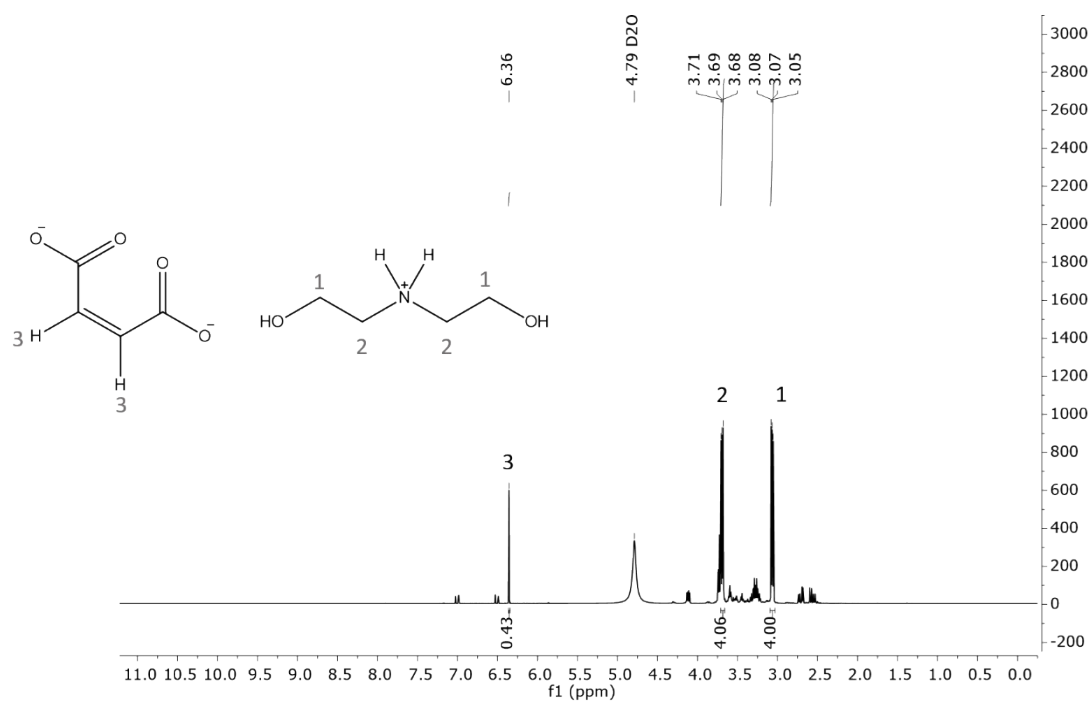

**Figure S4:**  $^1\text{H}$  NMR spectrum of pure protic ionic liquid 2- HDEAMA.

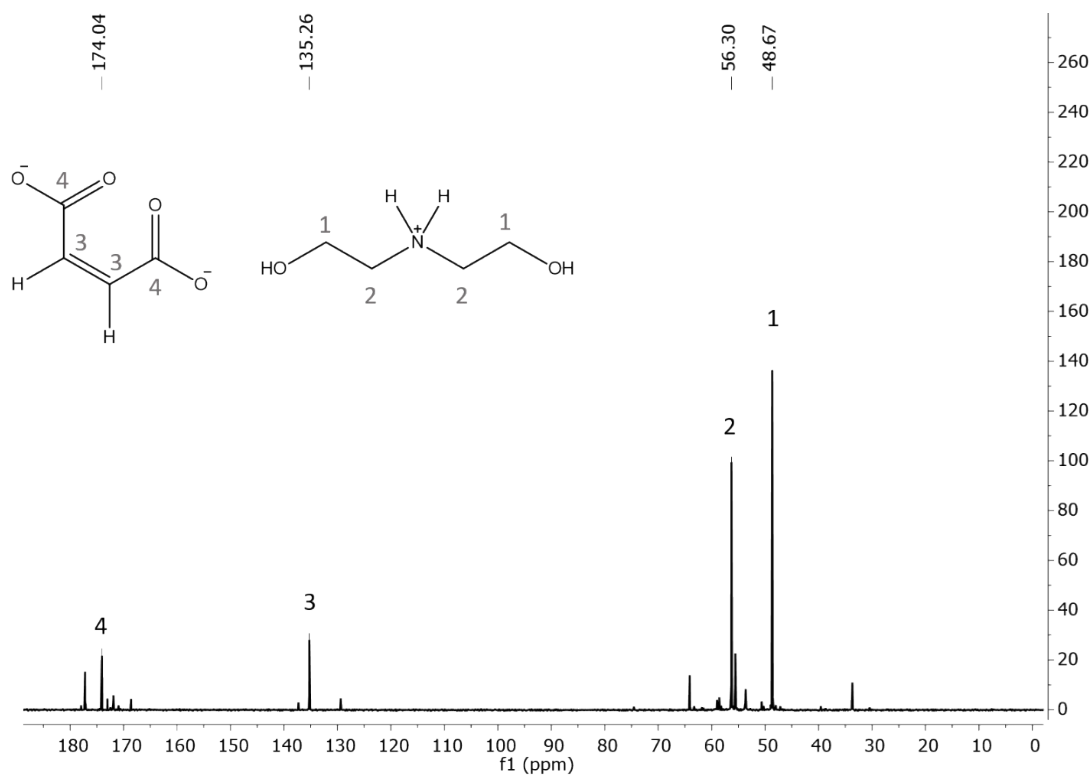

**Figure S5:**  $^{13}\text{C}$  NMR spectrum of pure protic ionic liquid 2- HDEAMa.

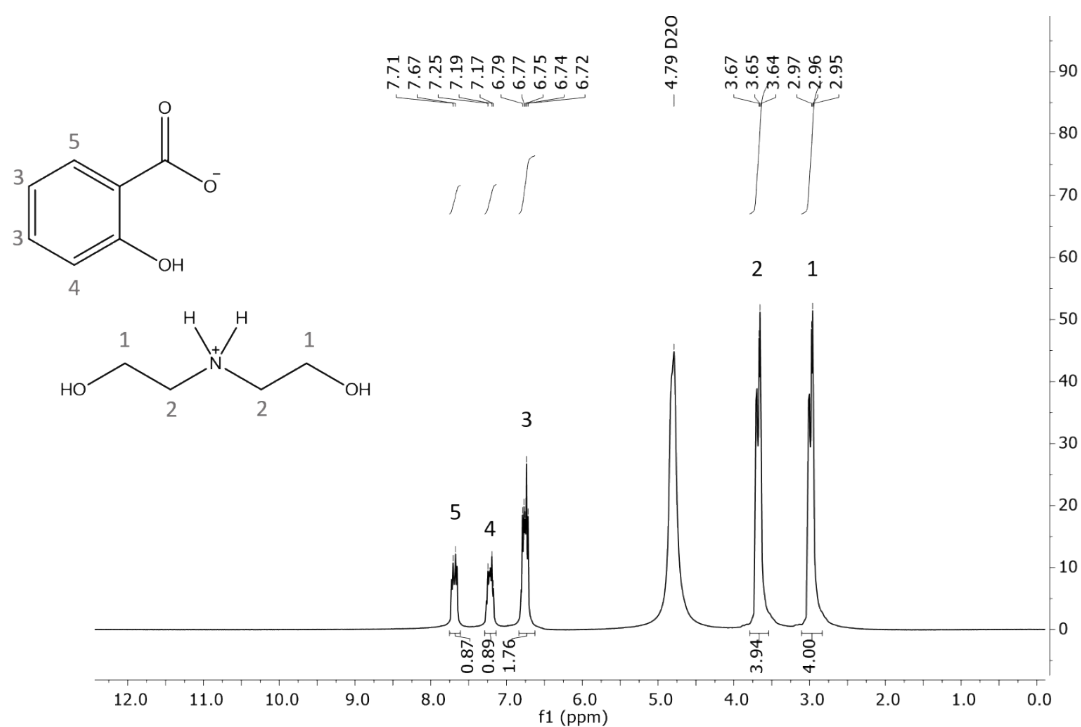

**Figure S6:**  $^1\text{H}$  NMR spectrum of pure protic ionic liquid 2- HDEASa.

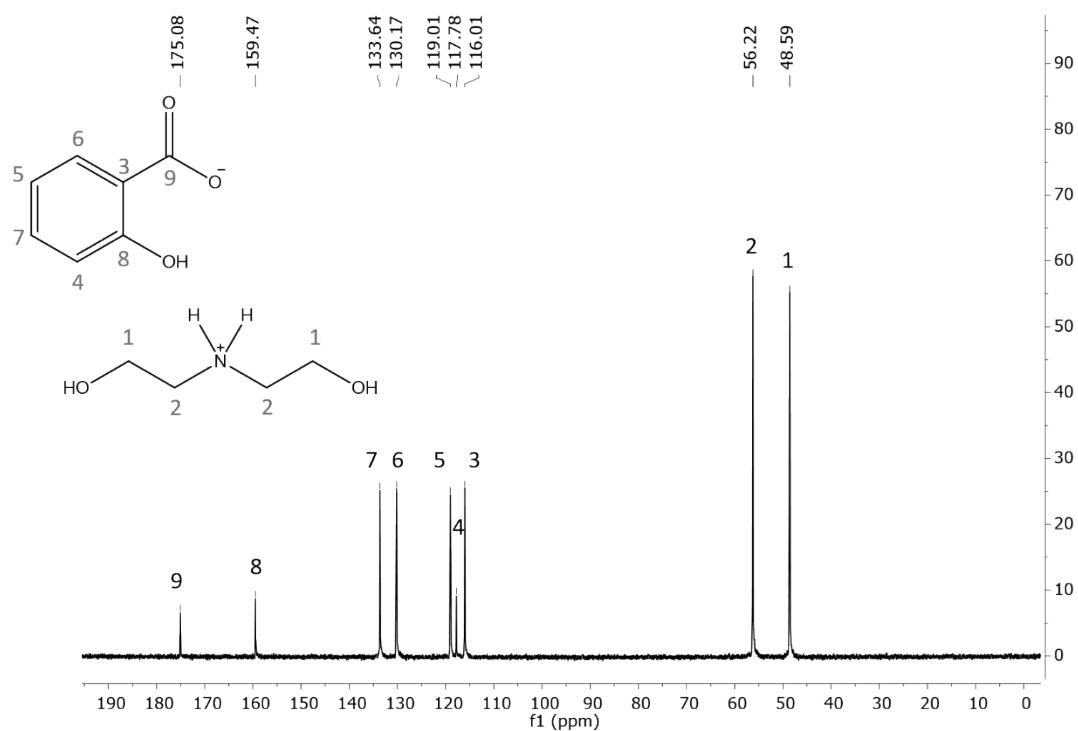

Figure S7: <sup>13</sup>C NMR spectrum of pure protic ionic liquid 2- HDEASa.

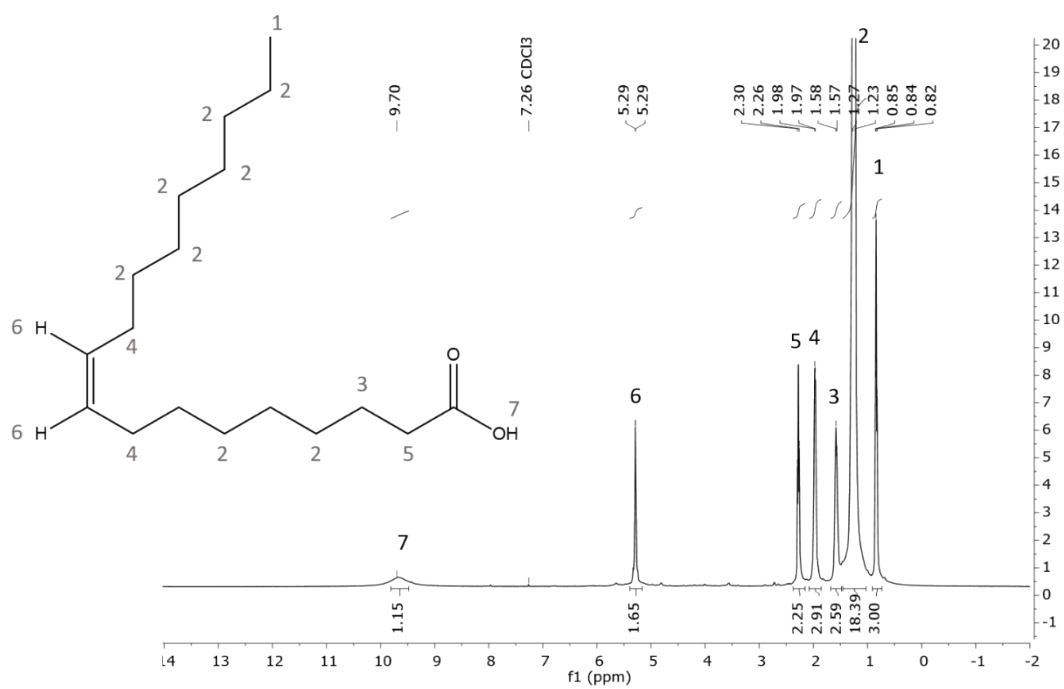

Figure S8: <sup>1</sup>H NMR spectrum of oleic acid.

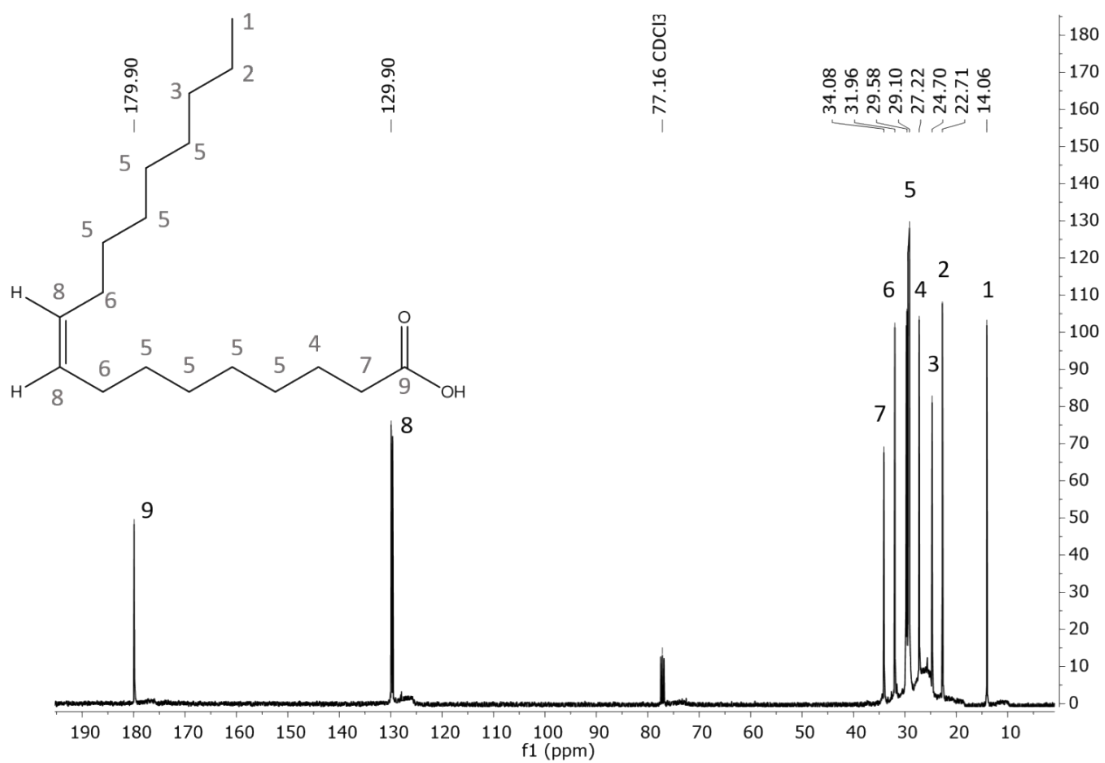

Figure S9: <sup>13</sup>C NMR spectrum of oleic acid.

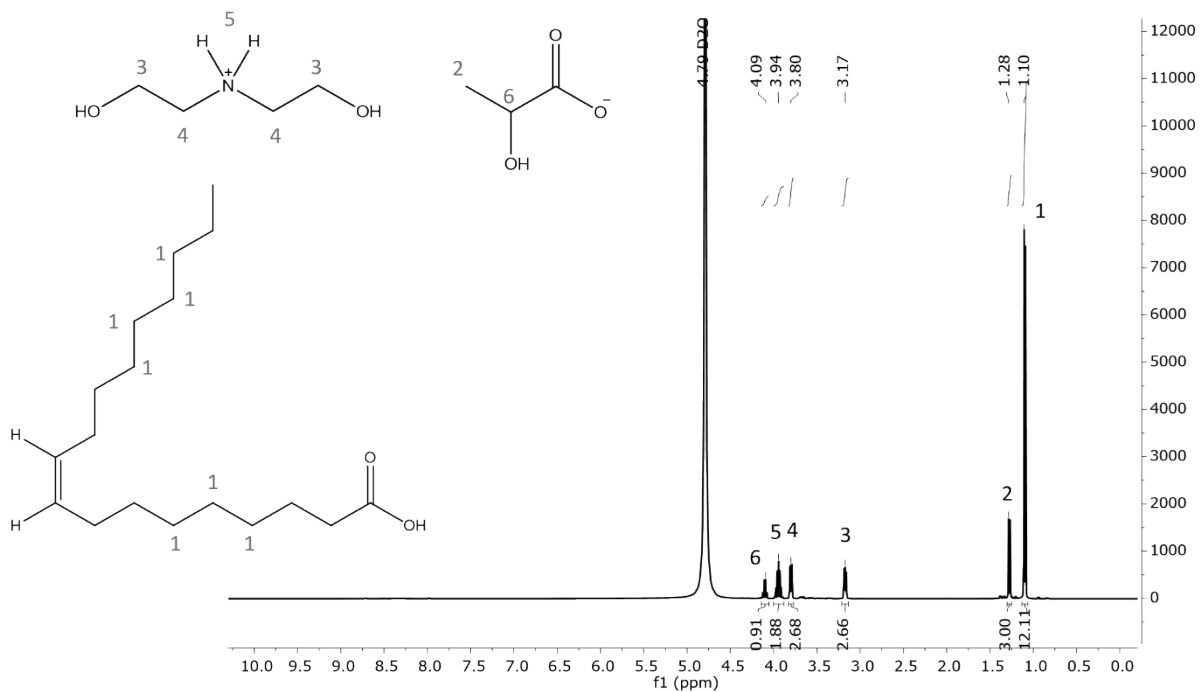

Figure S10. <sup>1</sup>H-NMR (400 MHz) spectra of nanoemulsion with PIL 2-HDEALa in D<sub>2</sub>O

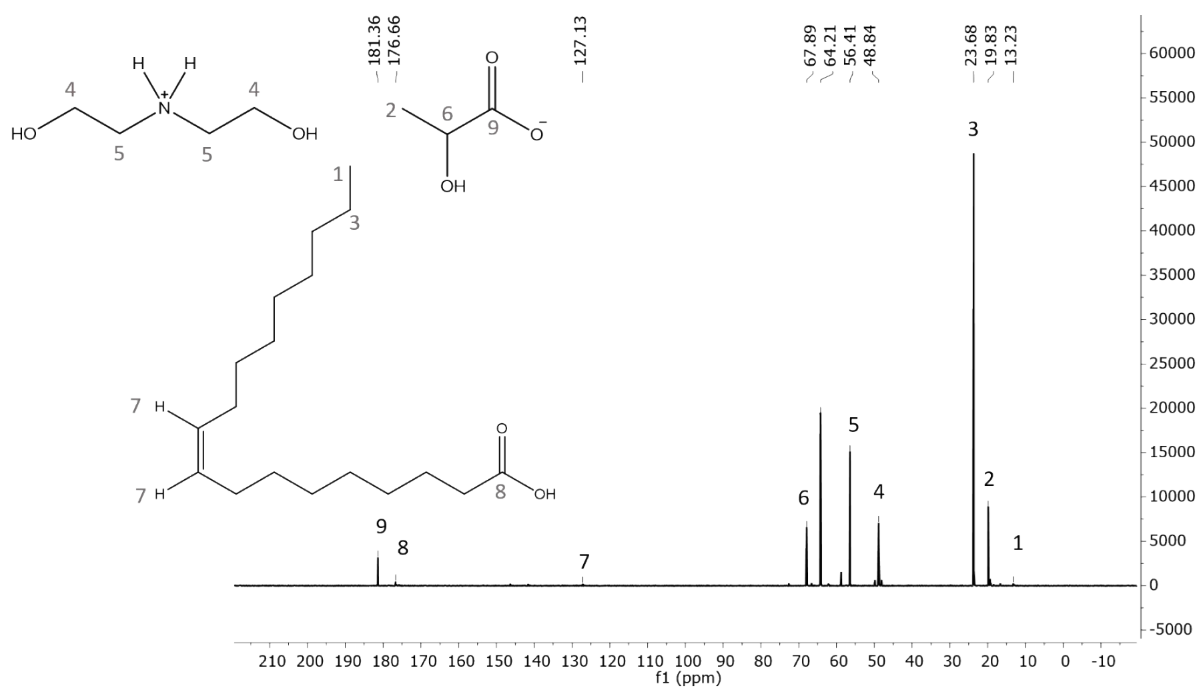

**Figure S11.**  $^{13}\text{C}$ -NMR (100 MHz) spectra of nanoemulsion with PIL 2-HDEALa in  $\text{D}_2\text{O}$

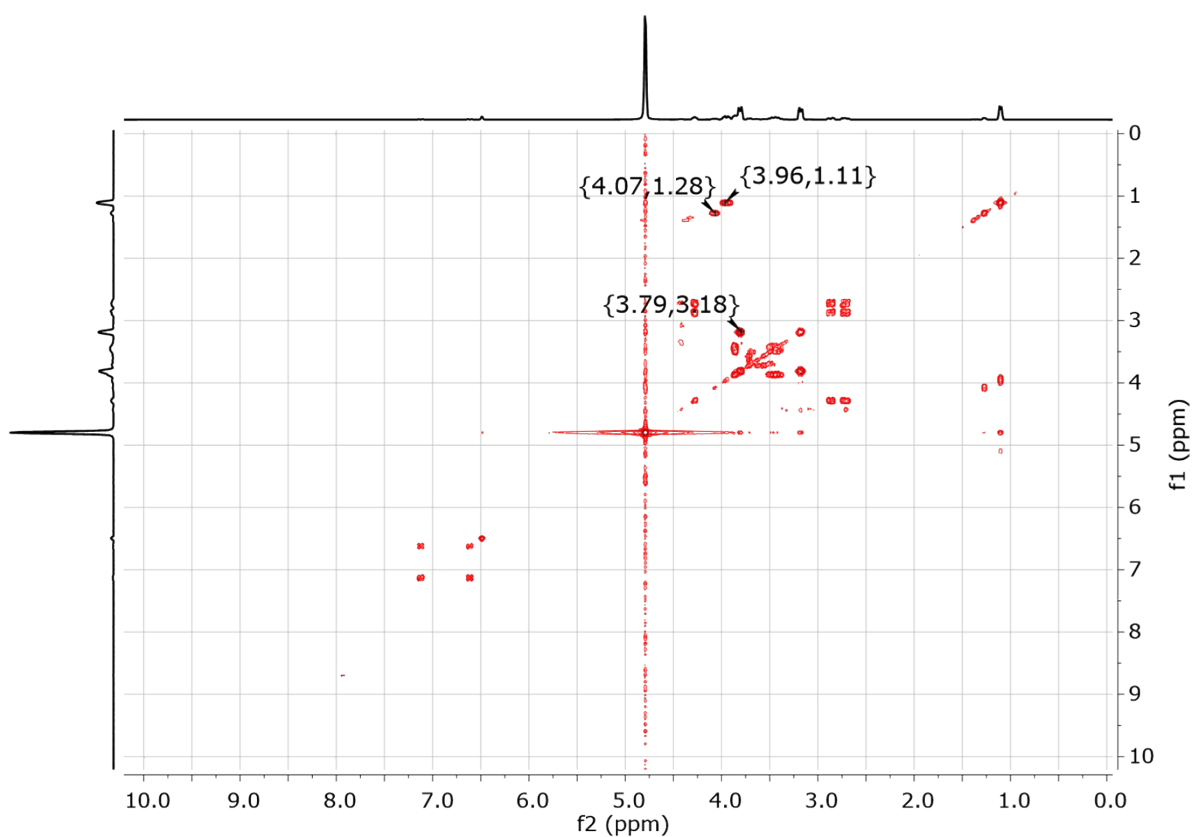

**Figure S12.**  $^1\text{H}$ - $^1\text{H}$  COSY contour map of nanoemulsion with PIL 2-HDEALa in  $\text{D}_2\text{O}$

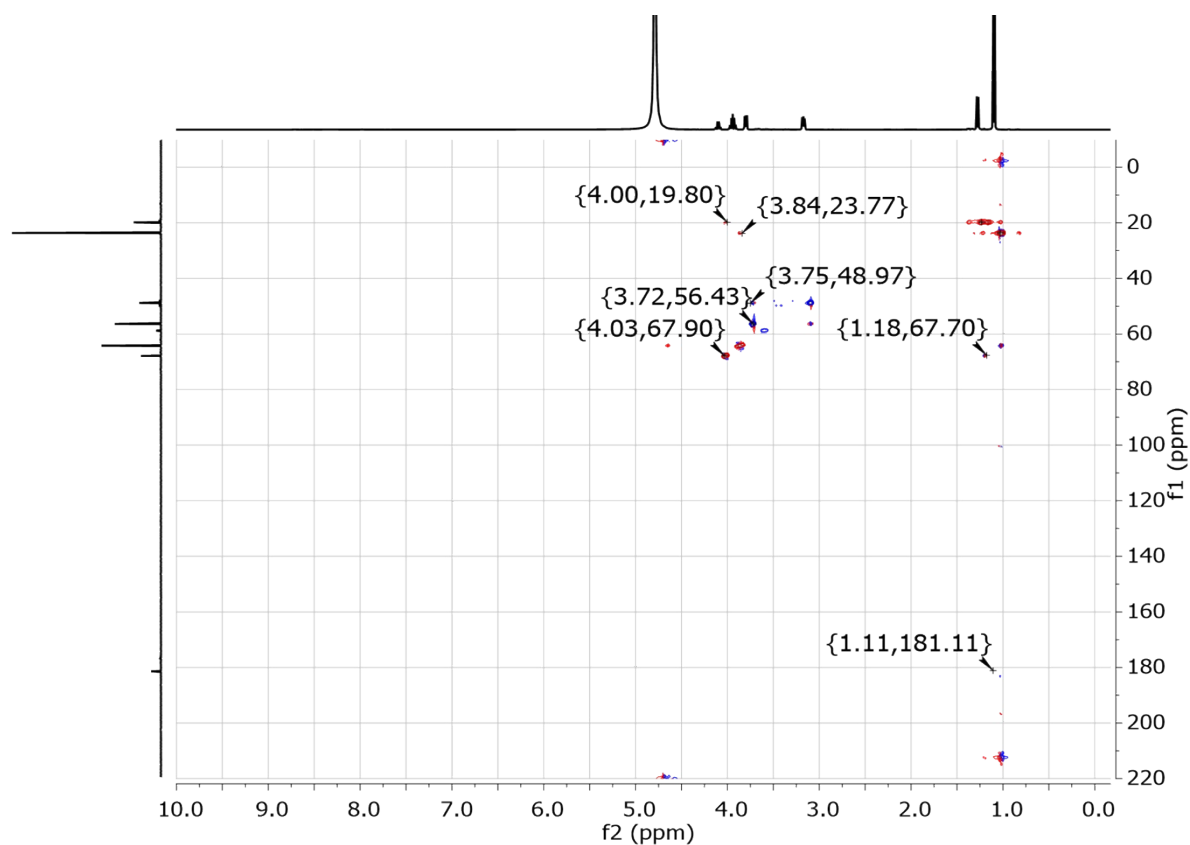

**Figure S13.**  $^1\text{H}$ - $^{13}\text{C}$  HSQC contour map of nanoemulsion with PIL 2-HDEALa in  $\text{D}_2\text{O}$

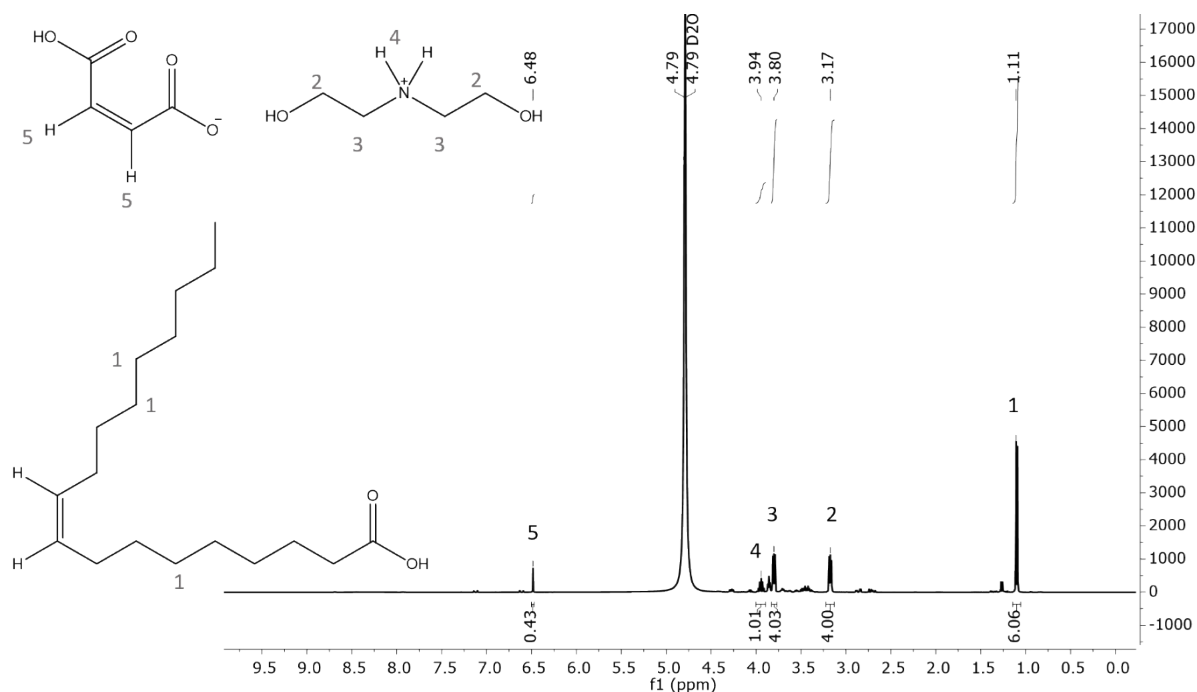

**Figure S14.**  $^1\text{H}$ -NMR (400 MHz) spectra of nanoemulsion with PIL 2-HDEAMA in  $\text{D}_2\text{O}$



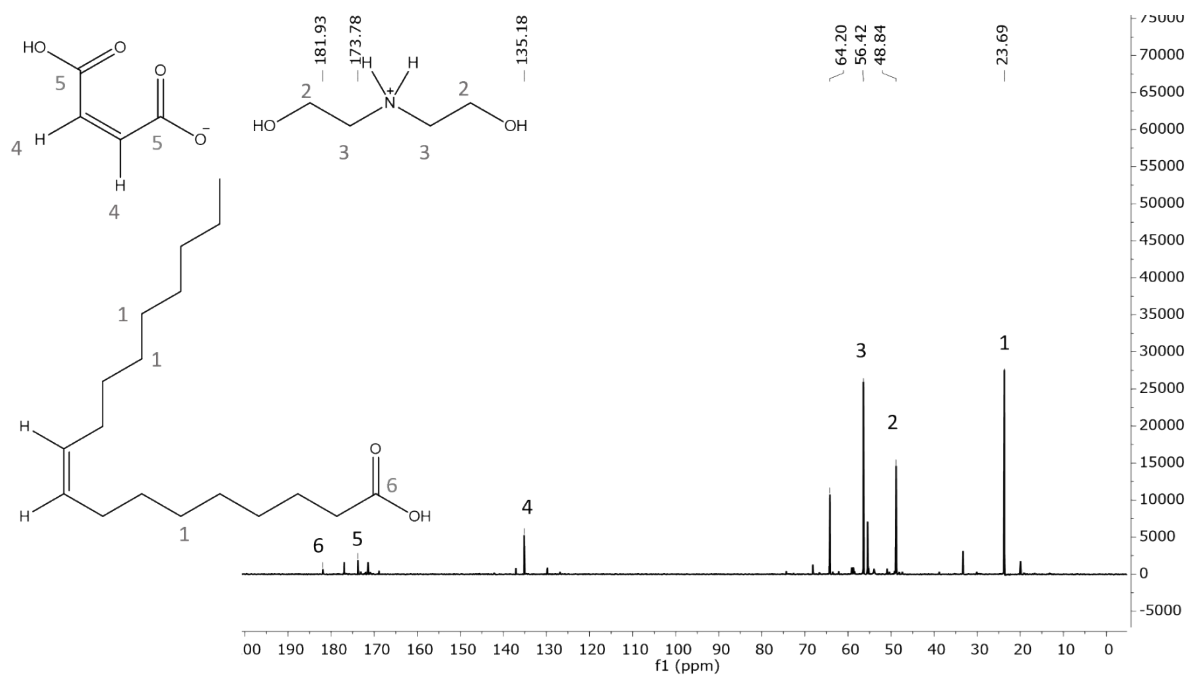

**Figure S15.**  $^{13}\text{C}$ -NMR (100 MHz) spectra of nanoemulsion with PIL 2-HDEAMa in  $\text{D}_2\text{O}$

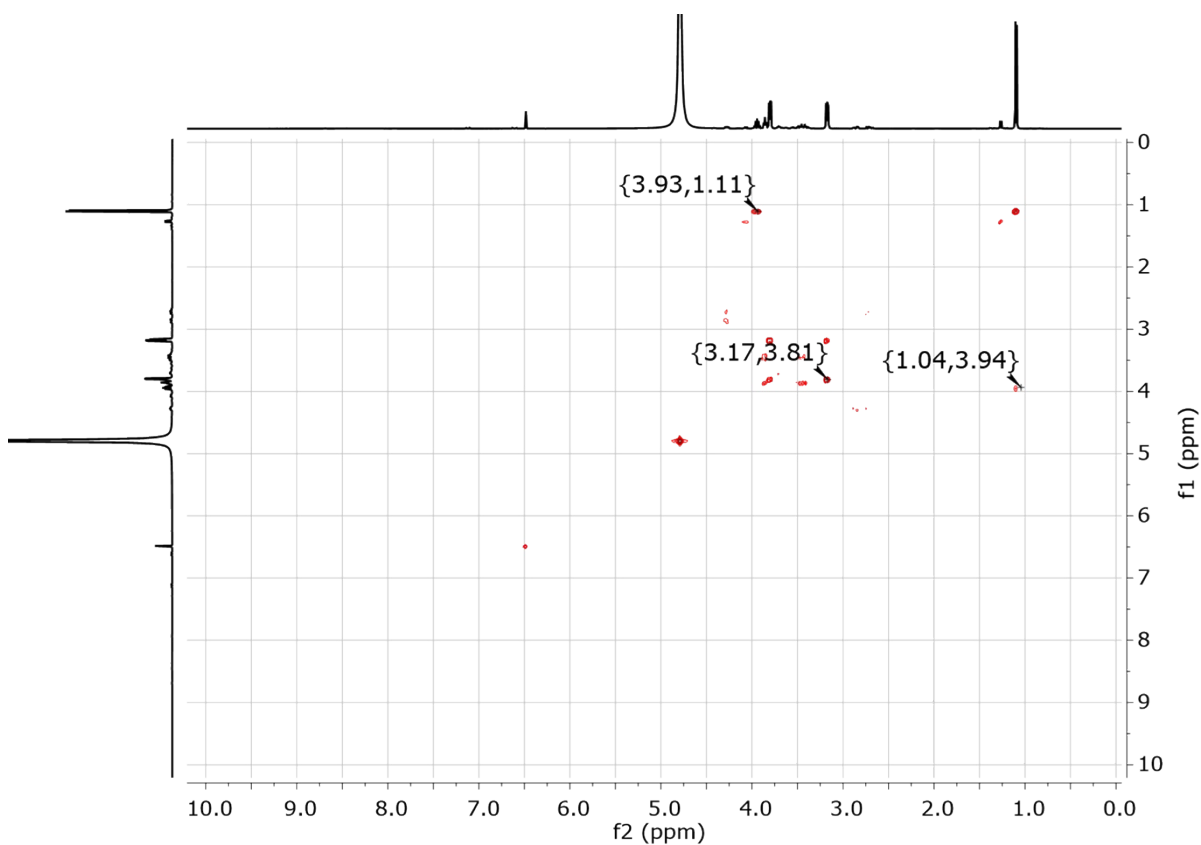

**Figure S16.**  $^1\text{H}$ - $^1\text{H}$  COSY contour map of nanoemulsion with PIL 2-HDEAMa in  $\text{D}_2\text{O}$

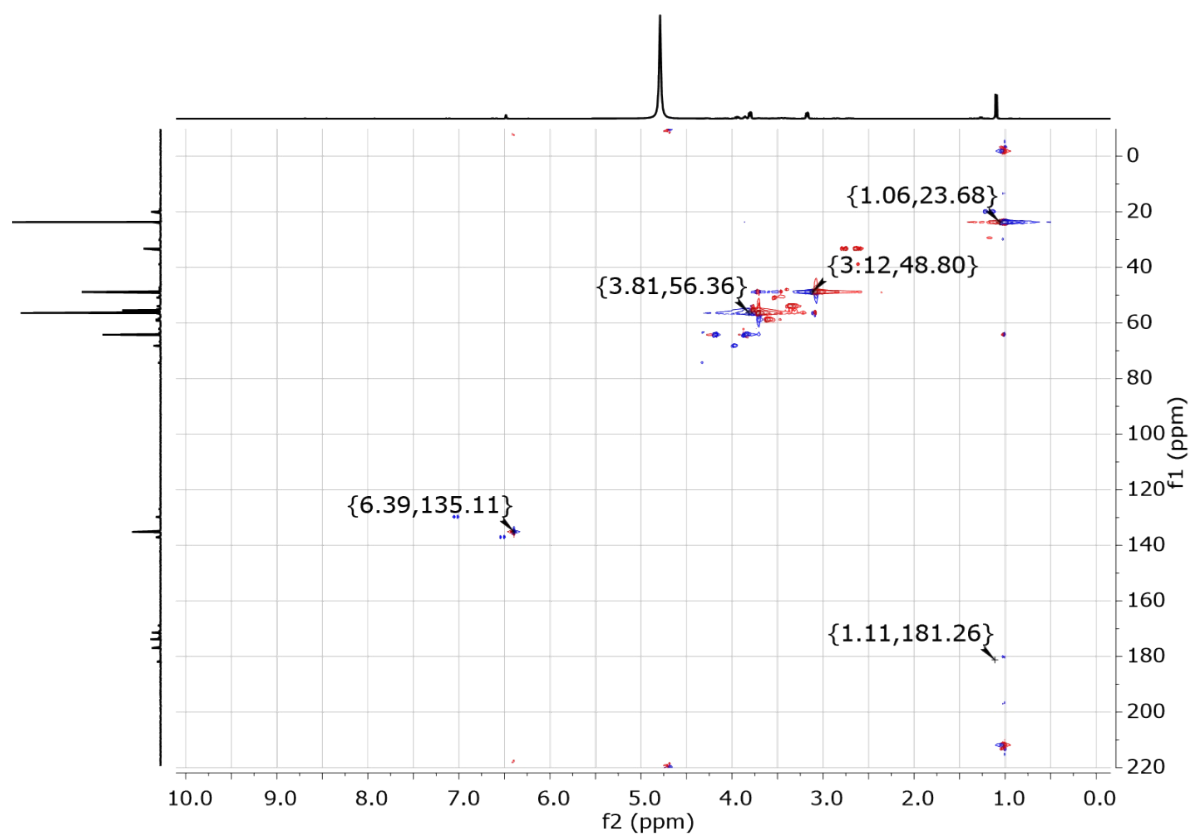

Figure S17.  $^1\text{H}$ - $^{13}\text{C}$  HSQC contour map of nanoemulsion with PIL 2-HDEAMa in  $\text{D}_2\text{O}$

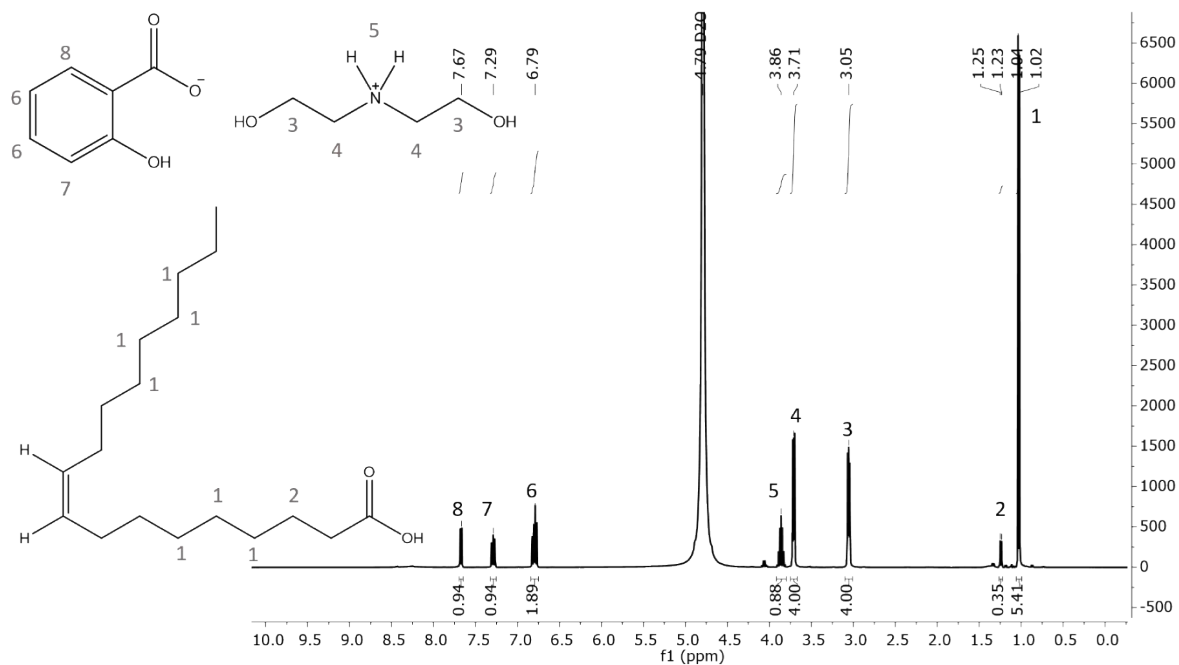

Figure S18.  $^1\text{H}$ -NMR (400 MHz) spectra of nanoemulsion with PIL 2-HDEASa in  $\text{D}_2\text{O}$

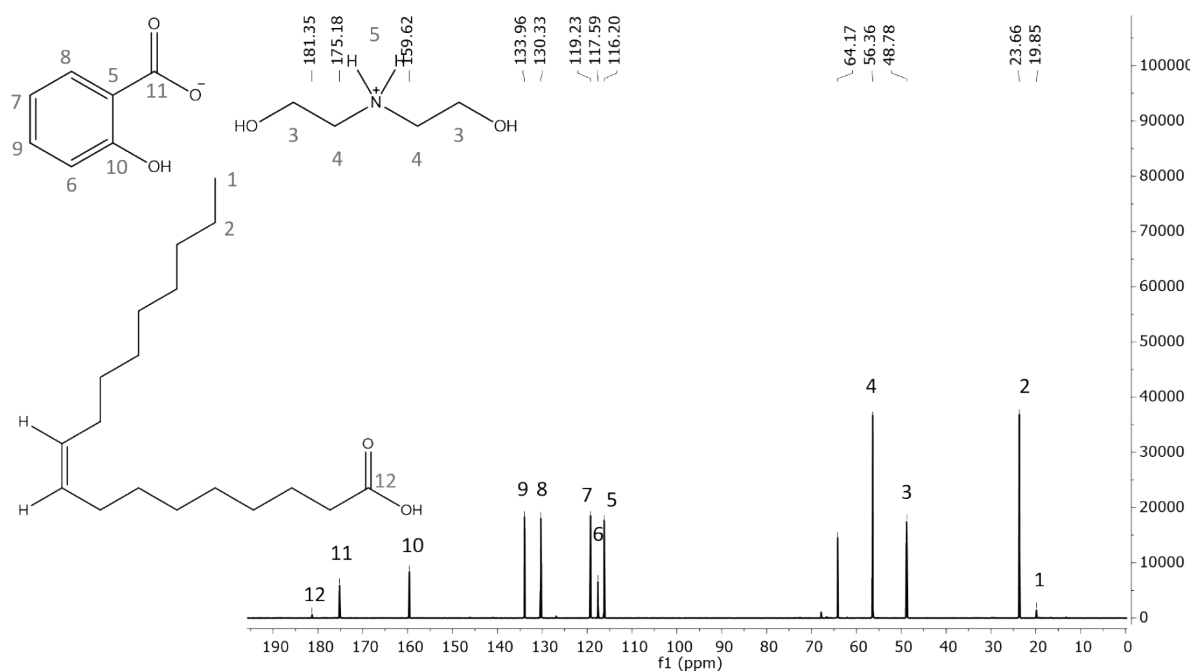

**Figure S19.**  $^{13}\text{C}$ -NMR (100 MHz) spectra of nanoemulsion with PIL 2-HDEASa in  $\text{D}_2\text{O}$

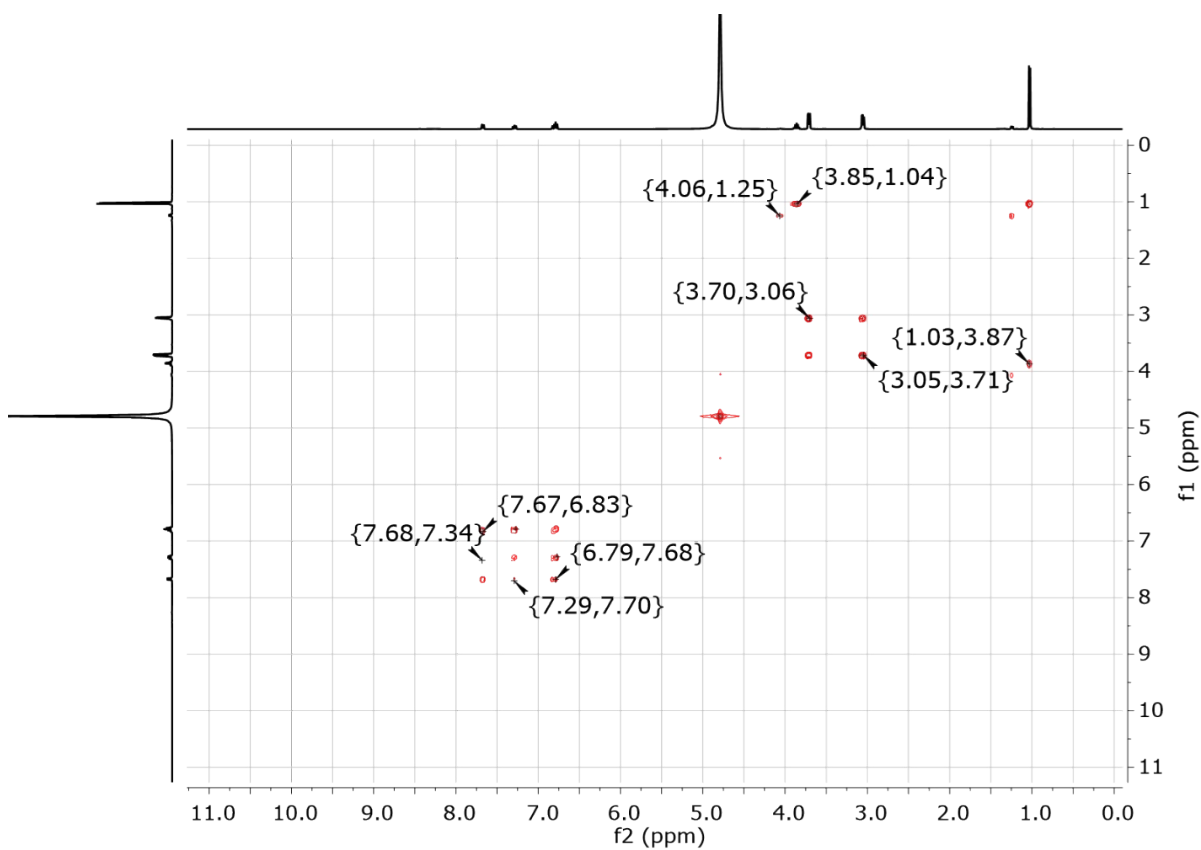

**Figure S20.**  $^1\text{H}$ - $^1\text{H}$  COSY contour map of nanoemulsion with PIL 2-HDEASa in  $\text{D}_2\text{O}$

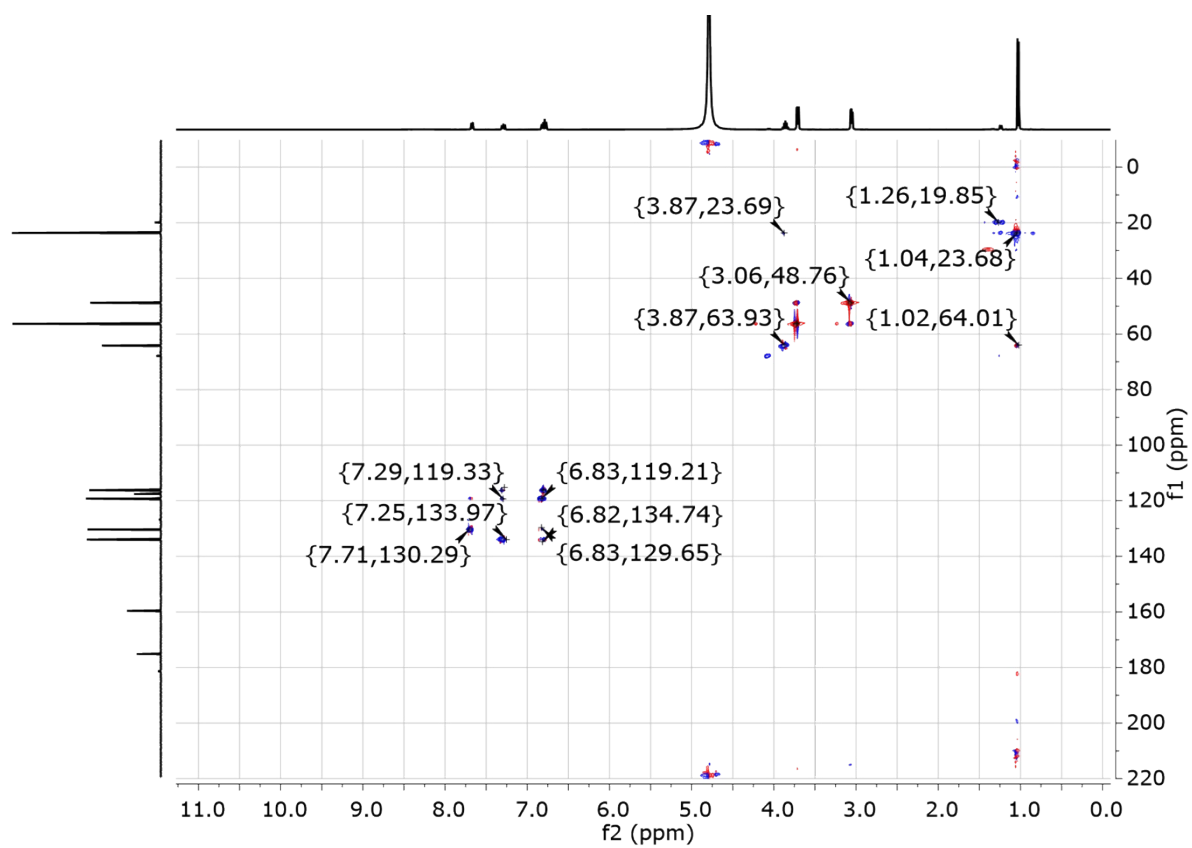

**Figure S21.**  $^1\text{H}$ - $^{13}\text{C}$  HSQC contour map of nanoemulsion with PIL 2-HDEASa in  $\text{D}_2\text{O}$
